# Supplementary material for: Concerted and differential actions of two enzymatic domains underlie Rad5 contributions to DNA damage tolerance
Source: PubMed Central journal article supplement (PMC4357696; doi:10.1093/nar/gkv004), 2015-02-17
Supplement: supp_gkv004_nar-03142-h-2014-File008.pdf [file supp_gkv004_nar-03142-h-2014-File008.pdf]

# Supplementary Fig 1

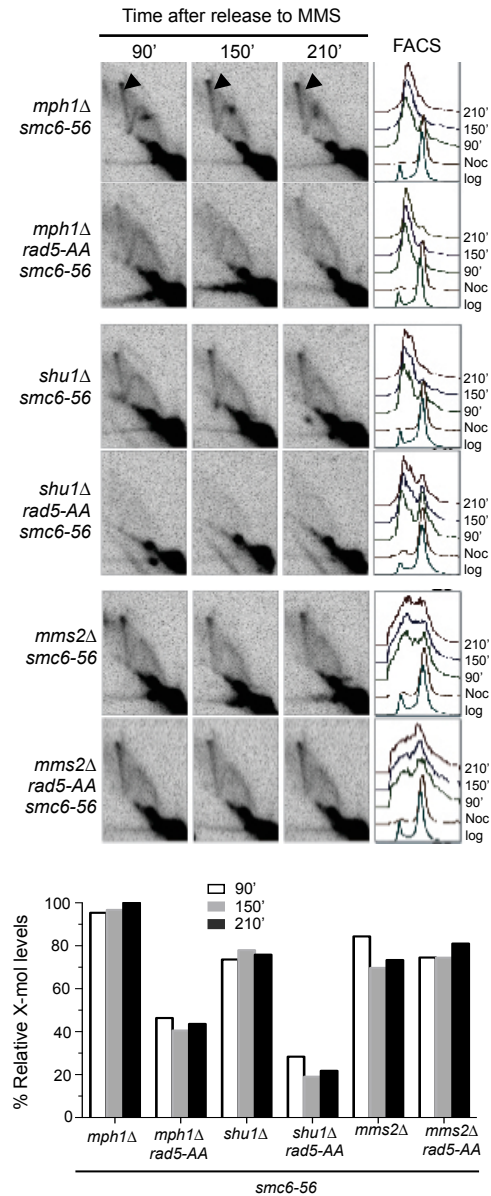

**Supplementary Figure 1. 2D gel examination of recombination intermediates of additional spore isolates to confirm the results in Figure 2E and 2F.** Experiments were performed as those in Figures 2E–2F, except different spore isolates of the indicated genotypes were examined. Consistent with Figures 2E–2F, in *smc6-56* background, *rad5-AA* further reduces the levels of recombination intermediates (arrow heads) when combined with *mph1Δ* or *shu1Δ*, but it is largely epistatic with *mms2Δ*.

## Supplementary Fig 2

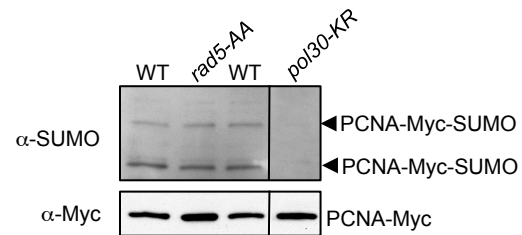

**Supplementary Figure 2. *rad5-AA* exhibits wild-type level of PCNA sumoylation.** Myc-tagged PCNA was immunoprecipitated and examined by anti-Myc and anti-SUMO antibodies. The absence of PCNA sumoylated forms is evident in mutant PCNA with mutated sumoylation sites (*Pol30-KR*) as shown previously.

### Supplementary Fig 3

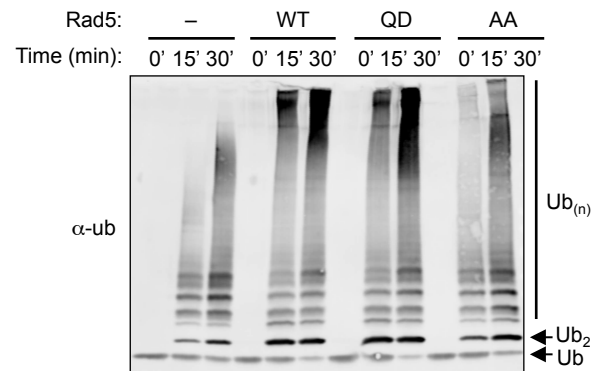

**Supplementary Figure 3. The rad5-QD mutant stimulates free ubiquitin chain formation *in vitro*.** The experiment was performed as in Figure 3D, but using 200 nM each of Mms2, Ubc13 and Rad5, 50 nM Uba1 (E1) and 10 mM ubiquitin.
